# Supplementary material for: Impact of low eGFR on the immune response against COVID-19
Source: Springer Nature journal article supplement (doi:10.1007/s40620-022-01374-1), 2022-07-02
Supplement: MOESM4 [file 23232316]

**Naive among CD19<sup>+</sup> (%)**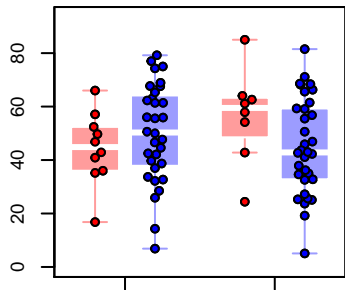**Plasmablasts among CD19<sup>+</sup> (%)**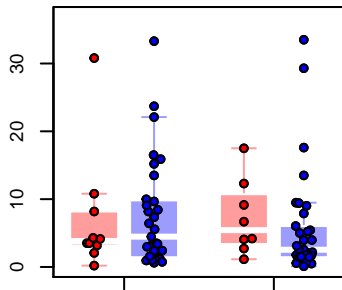**Switched Memory among CD19<sup>+</sup> (%)**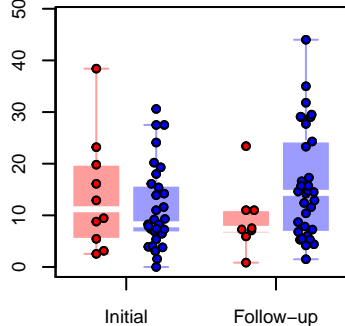**Transitional among CD19<sup>+</sup> (%)**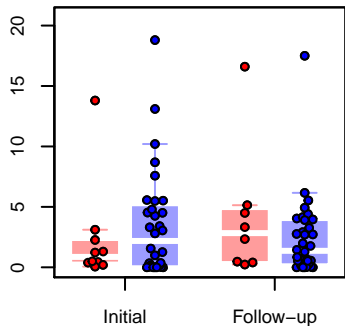**Marginal zone among CD19<sup>+</sup> (%)**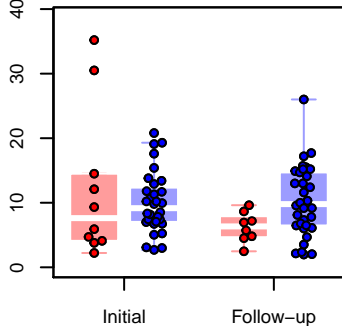

- Normal-eGFR (>60 ml/min/1.73m<sup>2</sup>)
- Low-eGFR (<60 ml/min/1.73m<sup>2</sup>)
