# Supplementary material for: Impact of low eGFR on the immune response against COVID-19
Source: Springer Nature journal article supplement (doi:10.1007/s40620-022-01374-1), 2022-07-02
Supplement: MOESM5 [file 23232316]

**IL-1 $\beta$  (pg/ml)**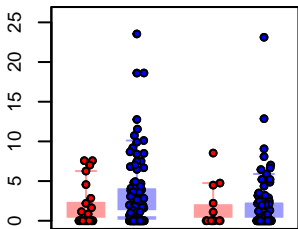**IFN- $\alpha$ 2 (pg/ml)**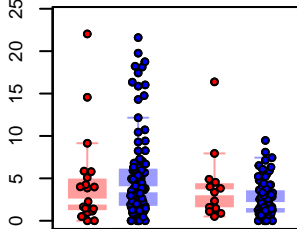**IFN- $\gamma$  (pg/ml)**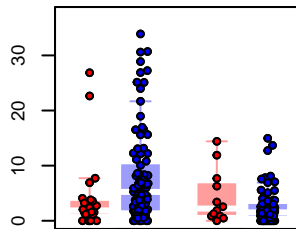**TNF- $\alpha$  (pg/ml)**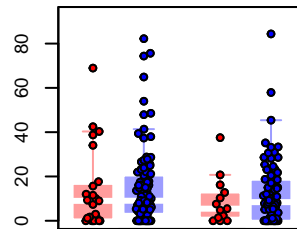**MCP-1 (pg/ml)**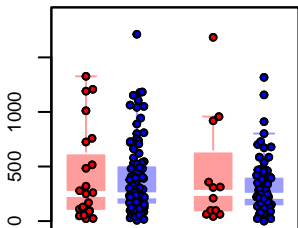**IL-6 (pg/ml)**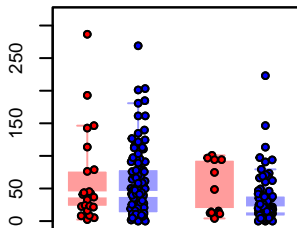**IL-8 (pg/ml)**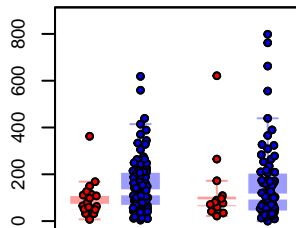**IL-10 (pg/ml)**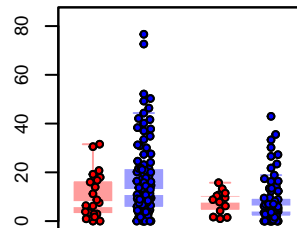**IL-12p70 (pg/ml)**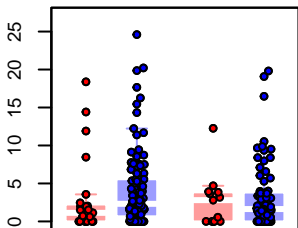**IL-17A (pg/ml)**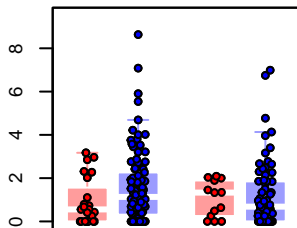**IL-18 (pg/ml)**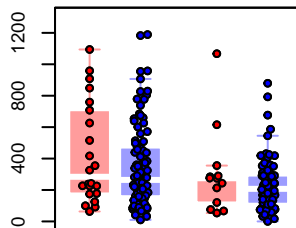**IL-23 (pg/ml)**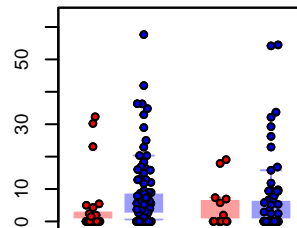**IL-33 (pg/ml)**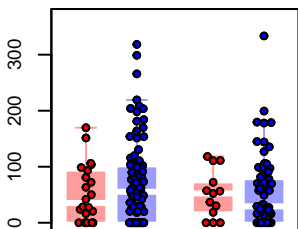

● Normal-eGFR  
(>60 ml/min/1.73m<sup>2</sup>)

● Low-eGFR  
(<60 ml/min/1.73m<sup>2</sup>)

Initial

Follow-up

Initial

Follow-up

Initial

Follow-up

Initial

Follow-up
